# Supplementary material
Source: PubMed Central journal article supplement (PMC7440770)
Supplement: IAI.00237-20-s0001.pdf [file IAI.00237-20-s0001.pdf]

1 **Fig. S1**  
2 **A**

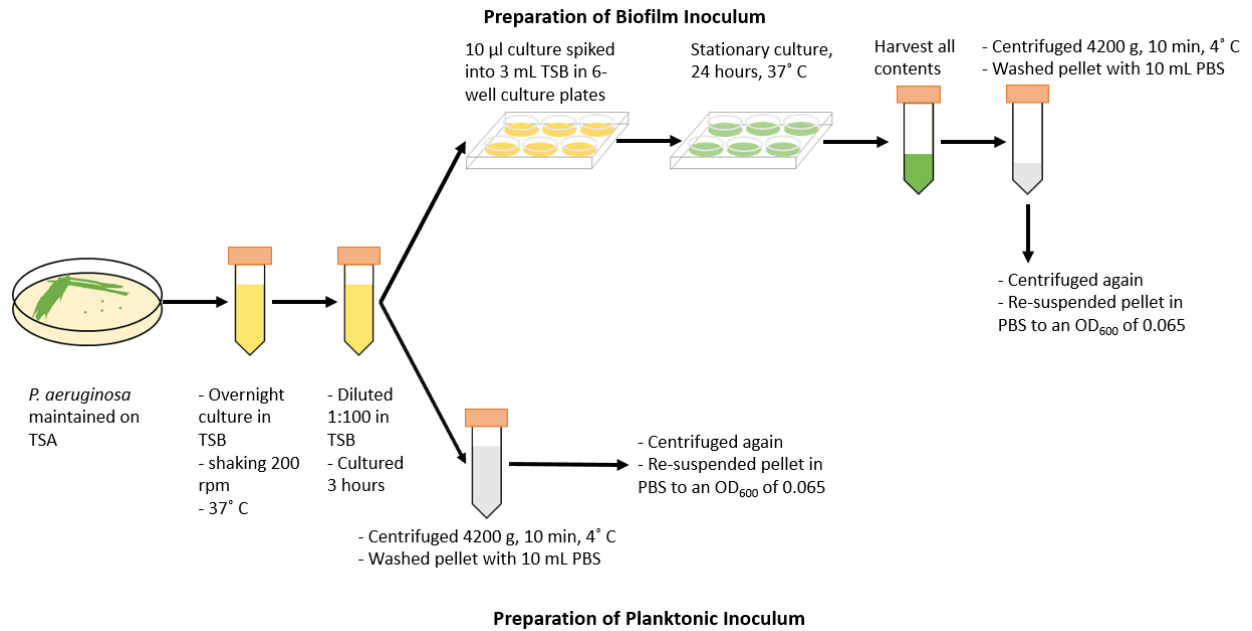

3 **B**  
4

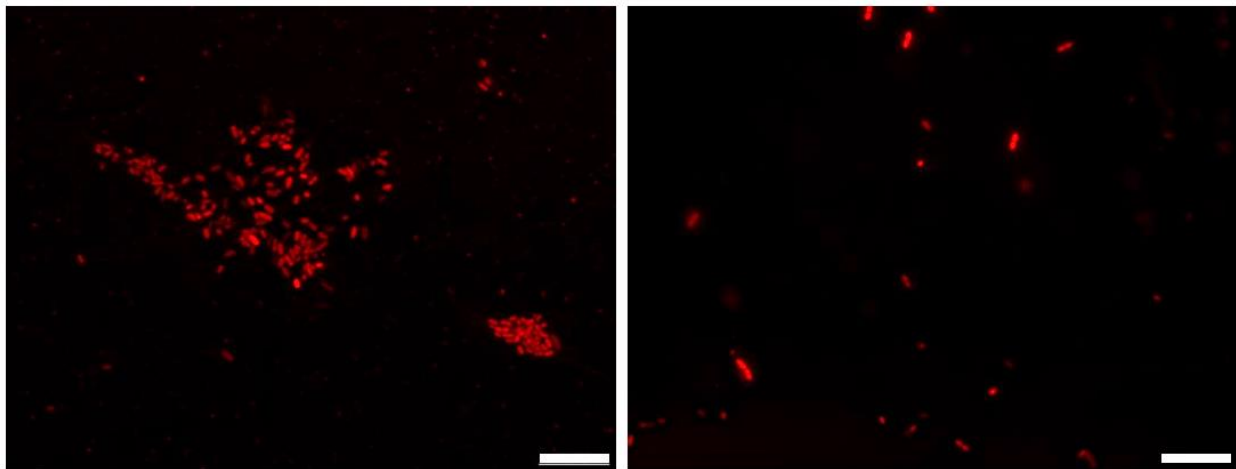

5  
6 **Fig. S1:** Preparation of biofilm and planktonic inocula. **A)** Schematic depicting preparation of  
7 biofilm and planktonic *P. aeruginosa* inocula. **B)** *P. aeruginosa* aggregates in a biofilm-grown  
8 inoculum (left). After homogenization, no aggregates are observed (right). Bacteria were  
9 visualized using 10 µM syto60 (Invitrogen). Bars represent 10 µm.

10  
11  
12  
13

14 Fig. S2

15 A

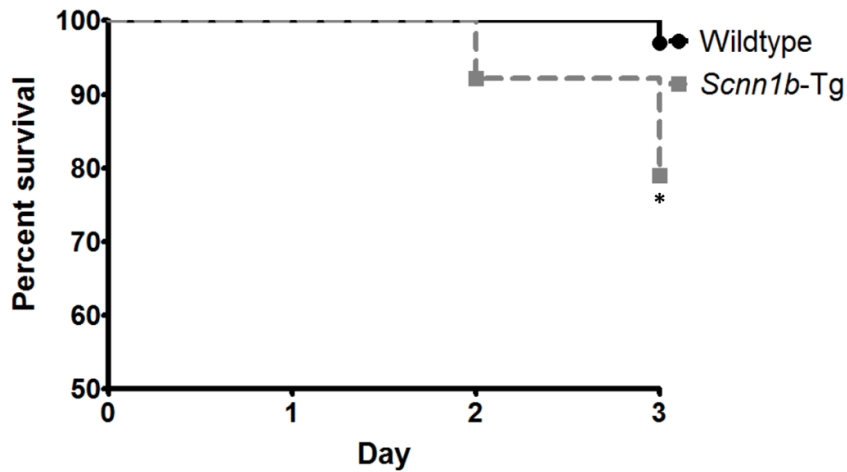

16

17

18

19 B

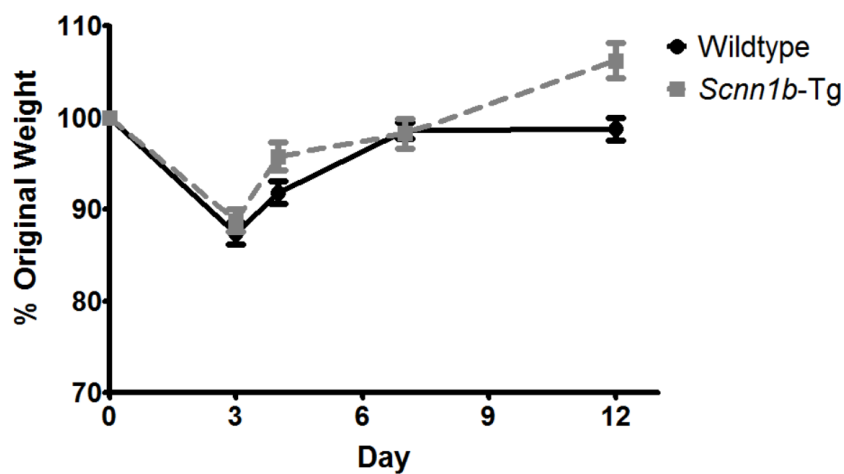

20

21 Fig. S2: Mortality and weight changes associated with infection. A) PAO1-infected *Scnn1b*-Tg

22 mice have higher mortality rates than wildtype mice. Mortality was limited to the first three days

23 of infection. Results are from three independent infections, n = 33 wildtype and 38 *Scnn1b*-Tg

24 mice. Mortality was compared using log-rank tests. \* = p < 0.05, \*\* = p < 0.01, \*\*\* = p < 0.001

25 B) Both *Scnn1b*-Tg and wildtype BALB/c mice lose weight following PAO1 infection but

26 rebound by Day 7.

27

28

29 **Table S1**

|                               | <b>Tg Mock<br/>vs<br/>WT Mock</b> | <b>Tg D3<br/>vs<br/>WT D3</b> | <b>Tg D7<br/>Vs<br/>WT D7</b> | <b>Tg Mock<br/>vs<br/>Tg D3</b> | <b>WT Mock<br/>vs<br/>WT D3</b> | <b>Tg Mock<br/>vs<br/>Tg D7</b> | <b>WT Mock<br/>vs<br/>WT D7</b> |
|-------------------------------|-----------------------------------|-------------------------------|-------------------------------|---------------------------------|---------------------------------|---------------------------------|---------------------------------|
| <b>IFN<math>\gamma</math></b> | <i>0.037</i>                      | <i>0.013</i>                  | <i>0.048</i>                  | <i>0.003</i>                    | <i>0.005</i>                    | 0.765                           | 0.262                           |
| <b>IL-1<math>\beta</math></b> | 0.090                             | 0.117                         | <i>0.021</i>                  | <i>0.011</i>                    | <i>0.008</i>                    | 0.079                           | <i>0.018</i>                    |
| <b>IL-4</b>                   | 0.602                             | 0.903                         | 0.668                         | 0.124                           | 0.123                           | 0.715                           | 0.958                           |
| <b>IL-13</b>                  | 0.225                             | 0.592                         | 0.064                         | 0.250                           | 0.377                           | 0.671                           | 0.351                           |
| <b>TNF<math>\alpha</math></b> | 0.885                             | 0.495                         | 0.269                         | 0.974                           | 0.647                           | 0.511                           | 0.888                           |
| <b>IL-12 p70</b>              | 0.587                             | 0.952                         | 0.248                         | 0.478                           | 0.153                           | 0.133                           | 0.768                           |
| <b>TGF-<math>\beta</math></b> | 0.907                             | 0.123                         | 0.446                         | 0.883                           | 0.439                           | 0.636                           | 0.382                           |
| <b>IL-6</b>                   | 0.825                             | 0.067                         | 0.419                         | <i>0.040</i>                    | <i>0.024</i>                    | 0.199                           | 0.426                           |
| <b>IL-17</b>                  | 0.110                             | 0.081                         | 0.898                         | <i>0.025</i>                    | 0.117                           | 0.745                           | 0.209                           |
| <b>IL-22</b>                  | 0.547                             | 0.062                         | 0.198                         | <i>0.024</i>                    | <i>0.041</i>                    | 0.222                           | 0.507                           |
| <b>KC</b>                     | <i>0.040</i>                      | <i>0.049</i>                  | 0.301                         | 0.593                           | 0.051                           | 0.420                           | 0.144                           |

30  
31 **Table S1:** Calculated p-values for differences in cytokine levels in PAO1-infected mice.

32 Differences between groups were analyzed with two-tailed unpaired t-tests (n = 4-11 mice per  
33 group). Statistically significant values are italicized.

34  
35  
36  
37  
38  
39  
40  
41  
42  
43  
44  
45  
46  
47  
48  
49  
50  
51  
52  
53  
54  
55  
56  
57  
58  
59

60 **Fig. S3**

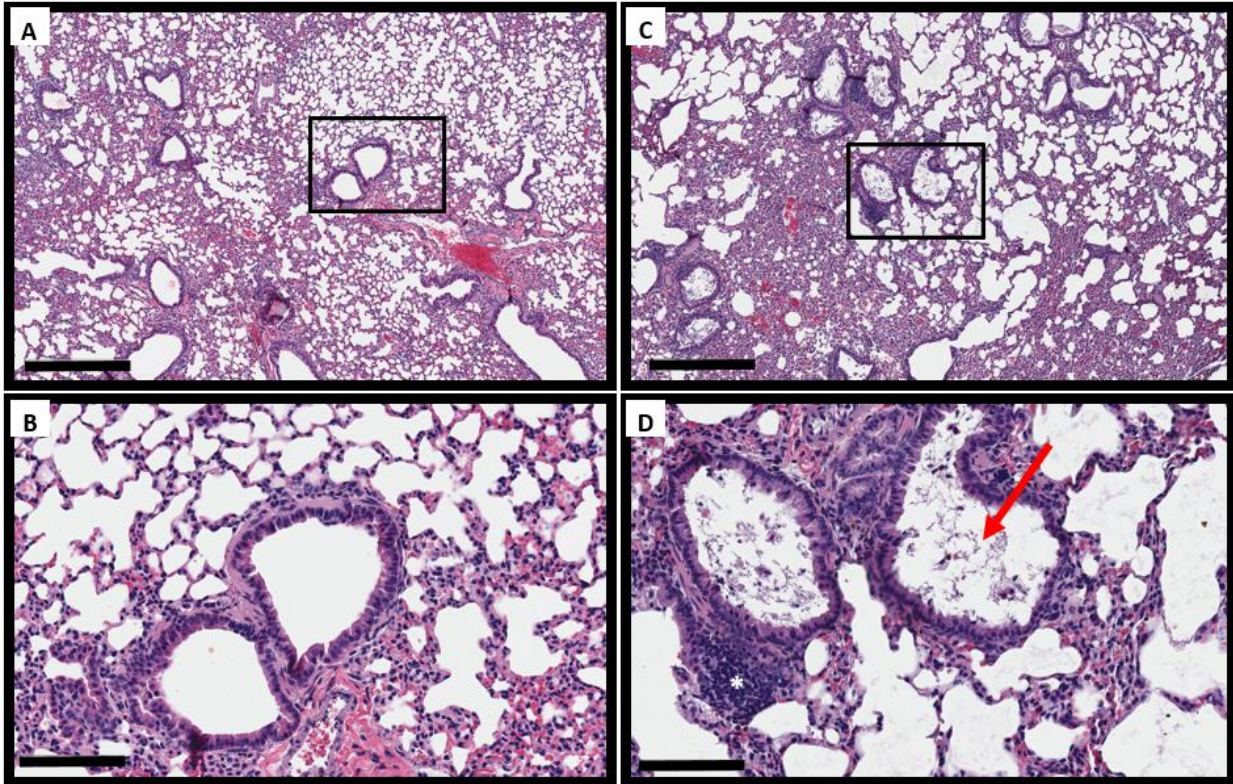

61  
62 **Fig. S3:** *Scnn1b*-Tg mice are characterized by mucus accumulation (red arrow), neutrophil  
63 infiltration, enlarged alveoli, and lymphoid hyperplasia (\*). Wildtype (**A&B**) and *Scnn1b*-Tg  
64 (**C&D**) mice were mock infected with sterile PBS. Scale bars represent 400  $\mu\text{m}$  (**A&C**) and 100  
65  $\mu\text{m}$  (**B&D**).

66  
67  
68  
69  
70  
71  
72  
73  
74  
75  
76  
77  
78  
79  
80  
81

82 **Fig. S4**

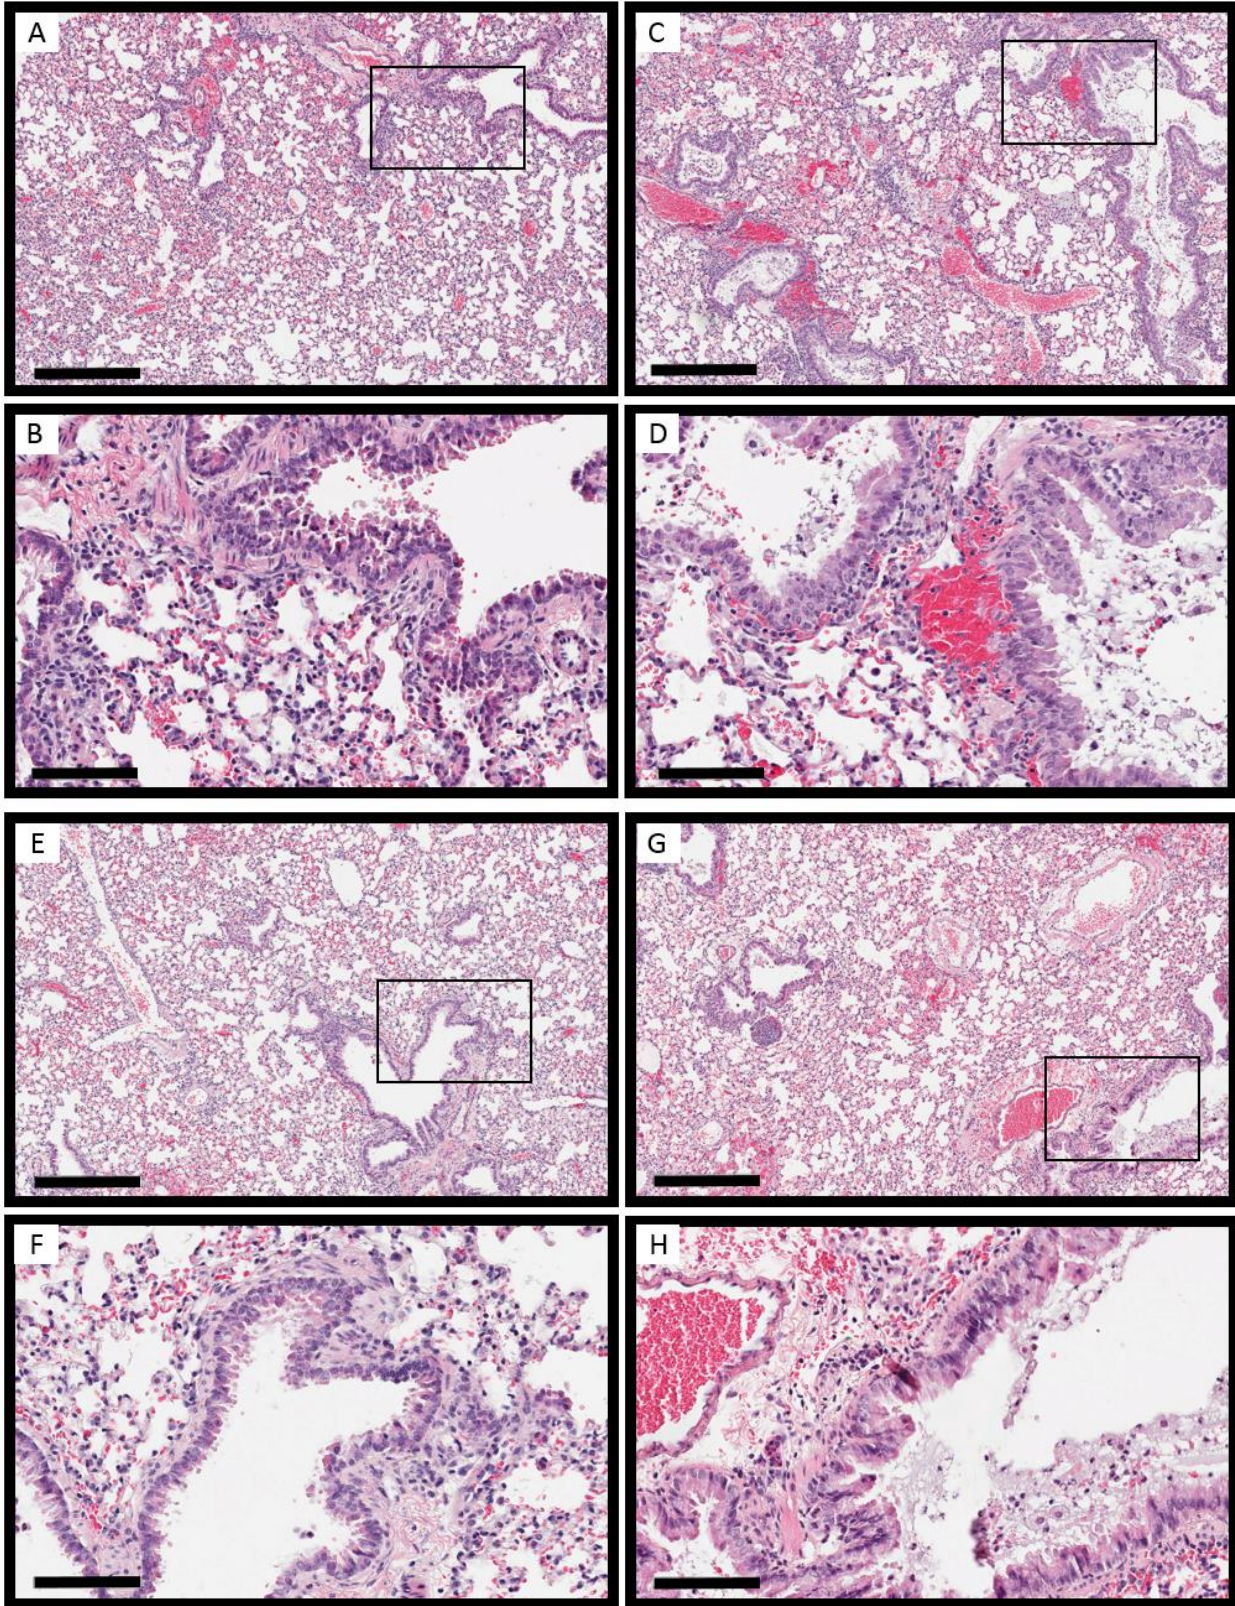

83

84

85 **Fig. S4:** Infection with CF001 (A-D) and CF002 (E-H) caused minor increases in inflammation,  
86 such as alveolar septal thickening and reactive cellular changes, in wildtype (A&B, E&F) and  
87 *Scnn1b*-Tg mice (C&D, G&H) on Day 7 post-infection. Scale bars represent 400  $\mu\text{m}$  (A&C,  
88 **E&F**) and 100  $\mu\text{m}$  (B&D, F&H).

89

90

91

92

93

94

95

96

97

98

99

100

101

102

103

104

105

106

107

108 **Fig. S5**

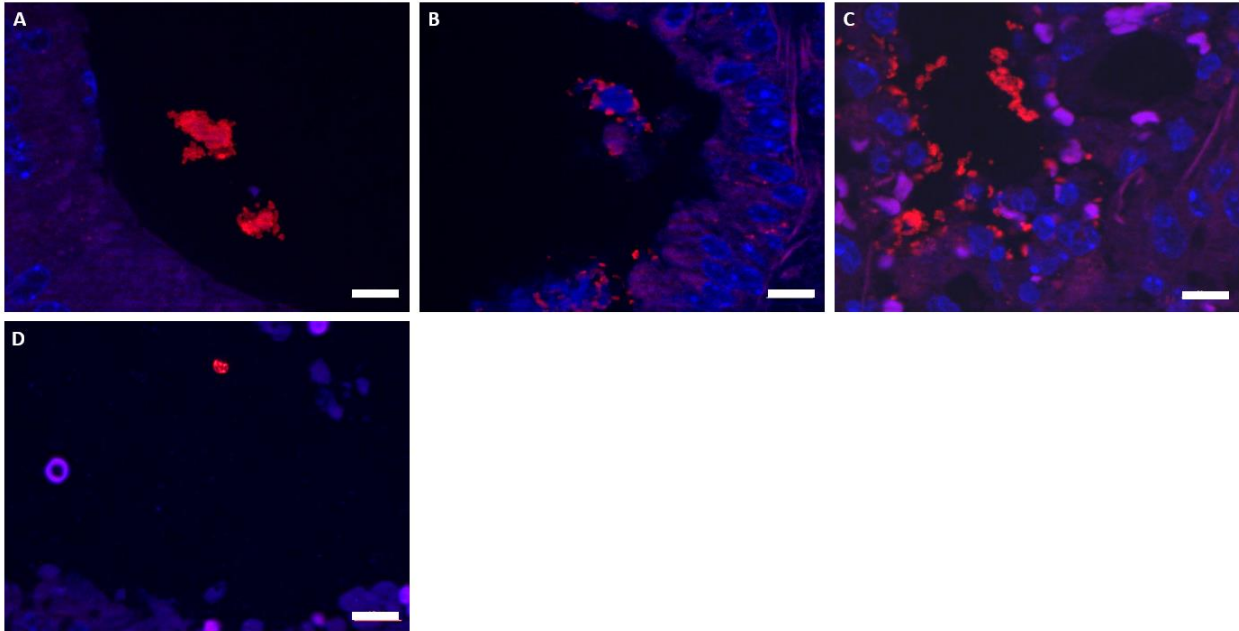

109 **Fig. S5:** CF1188 formed aggregates in the lungs of *Scnn1b*-Tg mice (**A-C**), whereas PAO1 is  
110 found in the bronchioles of *Scnn1b*-Tg mice as smaller aggregates and single bacteria (**D**). PAO1  
111 and CF1188 were identified in *Scnn1b*-Tg mouse lungs using immunohistochemistry. Three  
112 bacteria (red) are visible in the mucus-obstructed bronchiole of a *Scnn1b*-Tg mouse. Scale bar  
113 represents 10  $\mu$ m.  
114  
115  
116
